# Supplementary material for: MOFs-derived porous Mn2O3 as high-performance anode material for Li-ion battery
Source: Royal Society of Chemistry journal article supplement (doi:10.1039/c4ta06292b), 2015-01-01
Supplement: c4ta06292b1.pdf [file c4ta06292b1.pdf]

# MOFs-derived Hierarchically Porous $Mn_2O_3$ as High-performance Anode Material for Li-ion Battery

Zhongchao Bai,<sup>\*a</sup> Yaohui Zhang,<sup>a</sup> Yuwen Zhang,<sup>a</sup> Chunli Guo,<sup>a</sup> Bin Tang<sup>a</sup> and Di Sun<sup>\*b</sup>

## Experimental section

Mn-LCP was synthesized as follows: an aqueous solution (10 mL) of  $Mn(NO_3)_2 \cdot 6H_2O$  (0.70 g, 2.50 mmol) was dropped into an ethanol-water mixture (v:v = 1:1, 10 mL) of 2,3,5,6-tetrabromobenzene-1,4-dicarboxylic acid,  $H_2(Br_4-bdc)$  (1.20 g, 2.50 mmol), NaOH (0.2 g, 5.0 mmol), and 4,4'-bipyridine (0.38 g, 2.50 mmol). Upon stirring the mixture, white powders were obtained. The powders were washed with water and ethanol for several times and dried at 60 °C for 5 h in air (yield 70%).

*Synthesis of porous  $Mn_2O_3$ :* An amount of the synthesized Mn-LCP was put into the crucible. The precursor was heated to 600 °C in air at a heating rate of 10 °C/min and then maintained at 600 °C for 3 h before being air-cooled to room temperature. Then, the black products were collected for structural characterization and the LIBs tests.

*Microsized  $Mn_2O_3$ :* commercial  $MnO_2$  was heated at 600 °C for 5 h in air.

## Electrochemical Investigation

The electrodes for electrochemical examinations were prepared with 70 wt% active materials of the fabricated porous  $Mn_2O_3$ , 20 wt% conducting acetylene black, and 10 wt% carboxymethyl cellulose (CMC) binder in water. The slurry was pasted on a clean copper foil followed by drying in vacuum at 100 °C for 12 h. The coated foil was then roll-pressed and cut into a disc. The cells were assembled using lithium foil as the counter electrode and the reference electrode, Celgard 2400 as the separator, and a solution of 1M LiPF<sub>6</sub> in a mixture of ethylene carbonate (EC)-ethyl methyl carbonate (EMC)-dimethyl carbonate (DMC) (1:1:1 by volume) as the electrolyte. The assembly of the cell was conducted in an argon-filled glove-box. The cells were charged and discharged from 0.01 to 3.0 V at different current densities (Land CT2001A). Cyclic voltammograms (CVs) were carried out on CHI-760 electrochemical workstation over the potential range 0.01–3.0 V at a scan rate of 0.1 mV s<sup>-1</sup>.

## Structural Characterization

The samples were characterized by X-ray powder diffraction (XRD) with a Bruker D8 advanced X-ray diffractometer equipped with graphite-monochromatized Cu K $\alpha$  radiation ( $K\alpha = 1.5418 \text{ \AA}$ ), recorded with the  $2\theta$  ranging from  $10^\circ$  to  $80^\circ$ . The scanning electron microscope images were taken with a JEOL JSM-7600F field-emission scanning electron microscope (FESEM). The high-resolution transmission electron microscope (HRTEM) images were recorded on a JEOL-2110 high-resolution transmission electron microscope at an acceleration voltage of 200 kV. The materials were further characterized by transmission electron microscopy (TEM) using JEOL-1011 microscope. Thermal gravimetric analysis (TGA) was carried out on a Mettler Toledo TGA/SDTA851 thermal analyzer apparatus. Nitrogen-sorption measurements were performed on a Tristar II 3020m gas sorptometer. Samples were degassed to 0.003 mmHg for 12 h at 608C. Specific surface areas were calculated by using the Brunauer–Emmett–Teller (BET) method, and pore sizes and volumes were estimated from pore-size distribution curves from the adsorption branches of the isotherms.

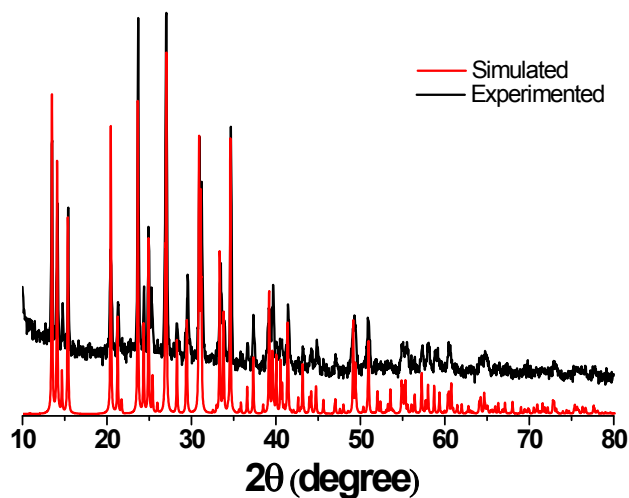

**Fig. S1** The XRD pattern of the obtained Mn-LCP sample and the simulated XRD pattern from single crystal data (refcode: SEFNAU).

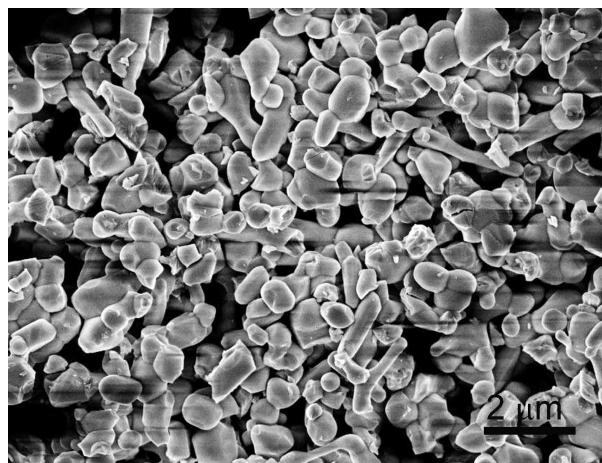

Fig. S2 The SEM image of the synthesized microsized Mn<sub>2</sub>O<sub>3</sub>.

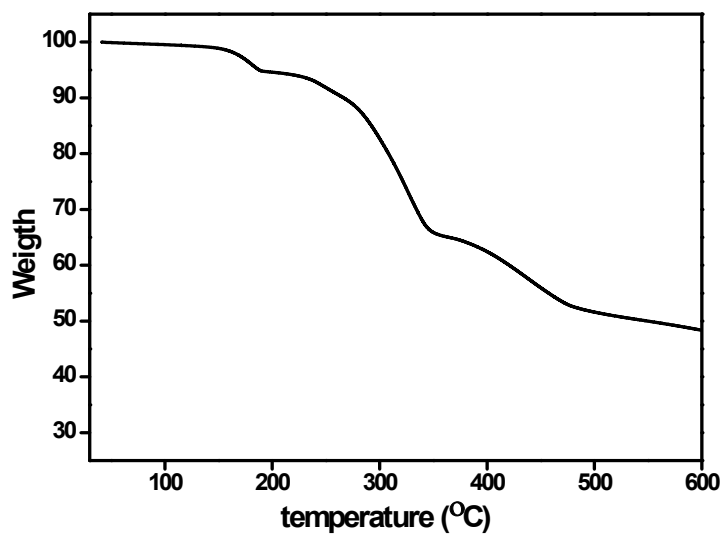

Fig. S3 the TGA curve of the Mn-LCP (in air 10 °C/min ).

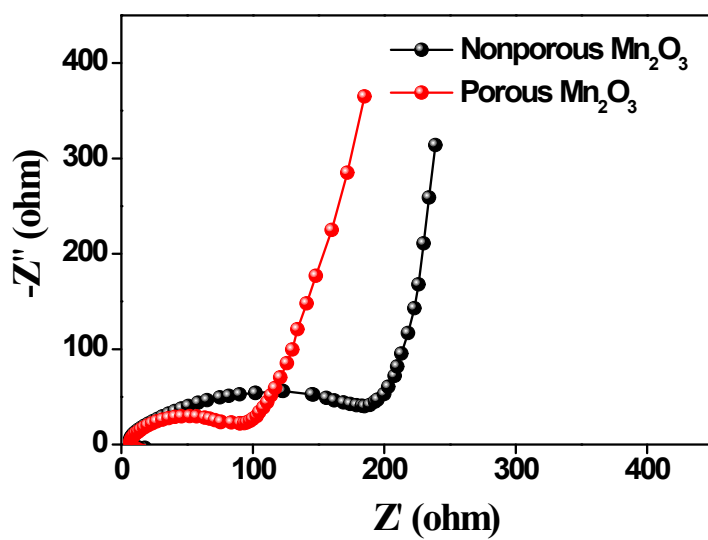

Fig. S4 Nyquist plots for the electrodes based on the porous porous  $Mn_2O_3$  and microsized  $Mn_2O_3$ .
